# Supplementary material
Source: PubMed Central journal article supplement (PMC6738901)
Supplement: jin-0009-0387-s03.pdf [file jin-0009-0387-s03.pdf]

**Figure S1. Purity of neutrophil preparations.**

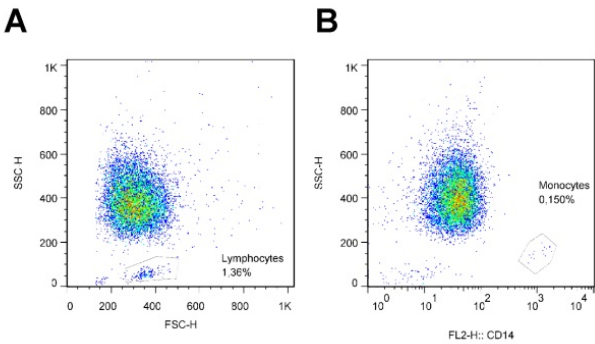

Representative dot plots of the isolated neutrophil preparations. Dot plot of forward (FSC-H) vs side scatter (SSC-H; A) and SSC-H vs CD14 expression (B). Gated cells in A represent lymphocytes (1.36%); and in B (0.15%) represent the contaminating monocytes (CD14<sup>high</sup> population).
