# Supplementary material
Source: PubMed Central journal article supplement (PMC6738901)
Supplement: jin-0009-0387-s04.pdf [file jin-0009-0387-s04.pdf]

**Figure S2. Differentiation status of the dendritic cell population employed to evaluate the effects of NET**

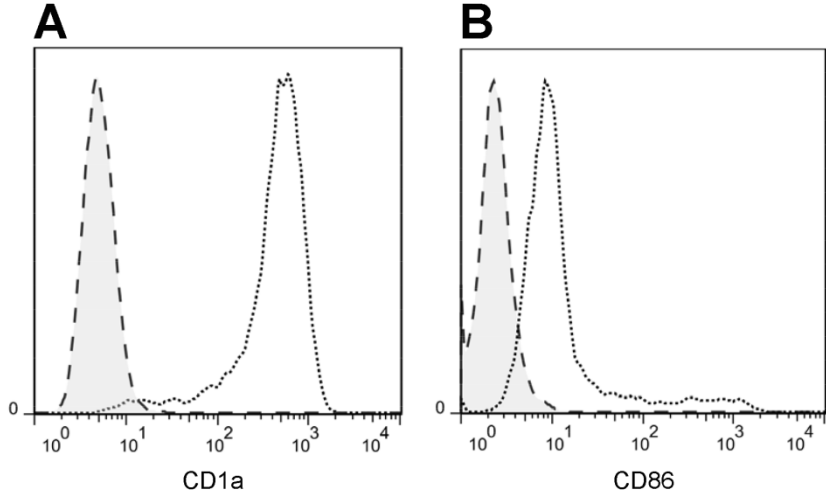

Expression profiles of CD1a (A) and CD86 (B) determined by immunofluorescence and flow cytometry in monocyte derived dendritic cells after culture in the presence of GM-CSF and IL-4. Dotted histograms, marker expression; dashed tinted histograms, isotype controls.
