# Supplementary material
Source: PubMed Central journal article supplement (PMC6738901)

**Figure S4. Dot plots depicting Annexin V-FITC and propidium iodide staining of neutrophils subjected to an ultrasonic pulse**

Neutrophils ( $5 \times 10^6$  PMN/ml) were left untreated (control) or subjected to a gentle 60 sec-long ultrasonic pulse (40 Hz; W200 ultrasonic bath; Branson), centrifuged, and stained with annexin V-FITC and propidium iodide. Then, fluorescence was evaluated by flow cytometry.

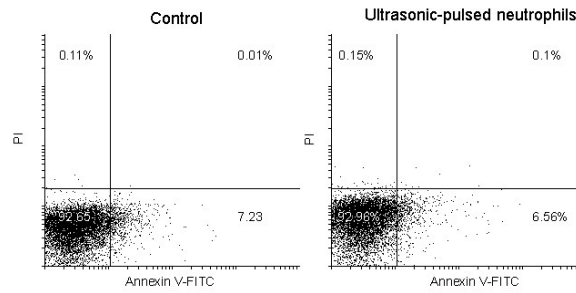

Supplement: jin-0009-0387-s06.pdf [file jin-0009-0387-s06.pdf]
