# Supplementary material
Source: PubMed Central journal article supplement (PMC6738901)
Supplement: jin-0009-0387-s08.pdf [file jin-0009-0387-s08.pdf]

**Figure S6. Identification of NET in the supernatants isolated from neutrophil cultures stimulated with MSU crystals, uric acid (UA) or cigarette smoke extract (CSE).**

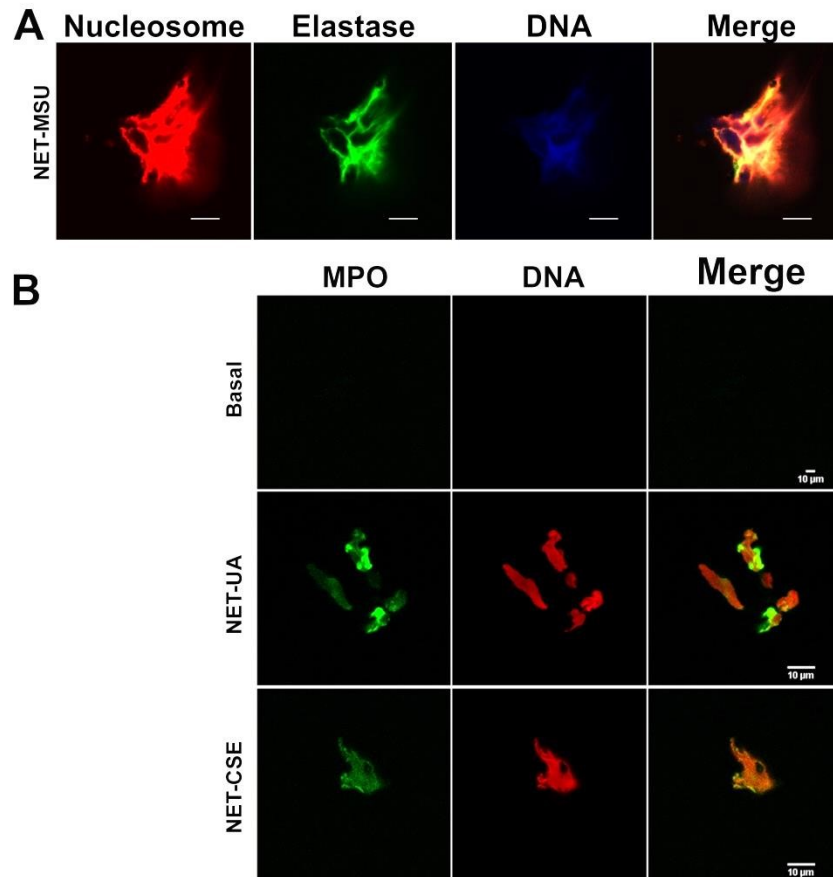

(A) Colocalization of elastase (green) and nucleosome (red) with DNA (TO-PRO-3; blue) or (B) colocalization of MPO (green) and DNA (PI; red), in the supernatant collected from neutrophils stimulated with MSU (A) or UA or CSE (B) following the protocol detailed in Methods. Supernatants were seeded onto poly-L-lysine-coated Lab-tek chambers coverslides. Images are representative of two experiments. Scale bars: 10  $\mu$ m.
