# Supplementary material
Source: PubMed Central journal article supplement (PMC6738901)
Supplement: jin-0009-0387-s10.pdf [file jin-0009-0387-s10.pdf]

**Figure S8. NET preparations do not contain significant amount of UA or CSE to stimulate of cytokine secretion by A549 cells.**

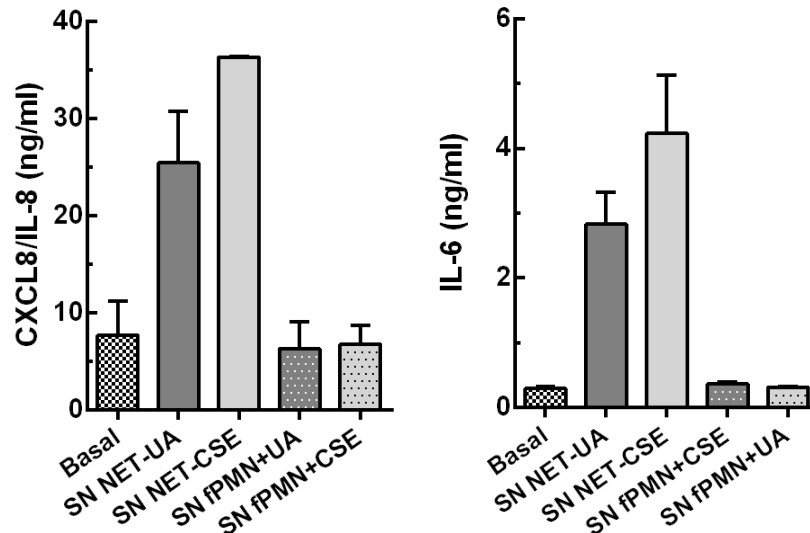

Secretion of CXCL8/IL-8 and IL-6 by A549 alveolar epithelial cells after 18 h of culture in the absence (Basal) or presence of UA-induced or CSE-induced NET (SN NET-UA or SN NET-CSE, respectively), or supernatants of PFA-fixed neutrophils (fPMN) incubated with UA or CSE mimicking the procedure as for NET isolation. Data are depicted as the mean  $\pm$  SEM of 2 independent experiments performed in triplicate.
