# Supplementary material
Source: PubMed Central journal article supplement (PMC6738901)
Supplement: jin-0009-0387-s11.pdf [file jin-0009-0387-s11.pdf]

**Figure S9. BEAS-2B viability is not markedly affected by NET-MSU.**

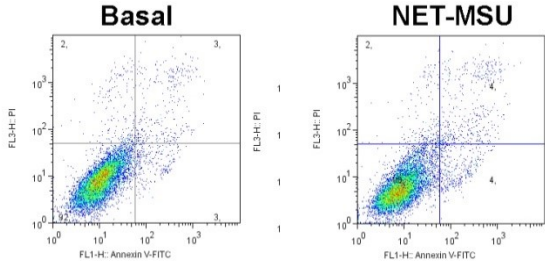

BEAS-2B epithelial cell viability after culture in the absence (Basal) or presence of NET-MSU for 18 h, determined using Annexin V/PI staining and flow cytometry. Data are representative of 2 experiments.
