# Supplementary material
Source: PubMed Central journal article supplement (PMC6738901)
Supplement: jin-0009-0387-s12.pdf [file jin-0009-0387-s12.pdf]

**Figure S10. Residual MSU does not stimulate CXCL8 /IL-8 cytokine secretion by human macrophages**

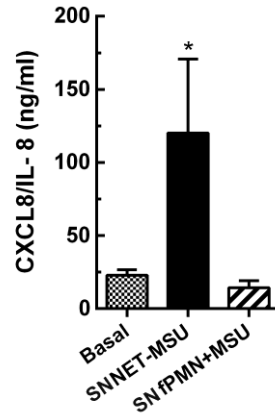

Secretion of CXCL8/IL-8 by human macrophages cultured in the absence (basal) or presence of supernatants of either MSU-stimulated neutrophils (SN NET-MSU) or SN PFA-fixed (fPMN) neutrophils incubated with MSU. Data are depicted as the mean  $\pm$  SEM of 4 independent experiments performed in triplicate. \* $p < 0.05$  (two-way ANOVA with repeated measures followed by Bonferroni's multiple comparisons test).
