# Supplementary material
Source: PubMed Central journal article supplement (PMC6738901)
Supplement: jin-0009-0387-s13.pdf [file jin-0009-0387-s13.pdf]

**Figure S11. Effect of treatment with MNase on NET-MSU**

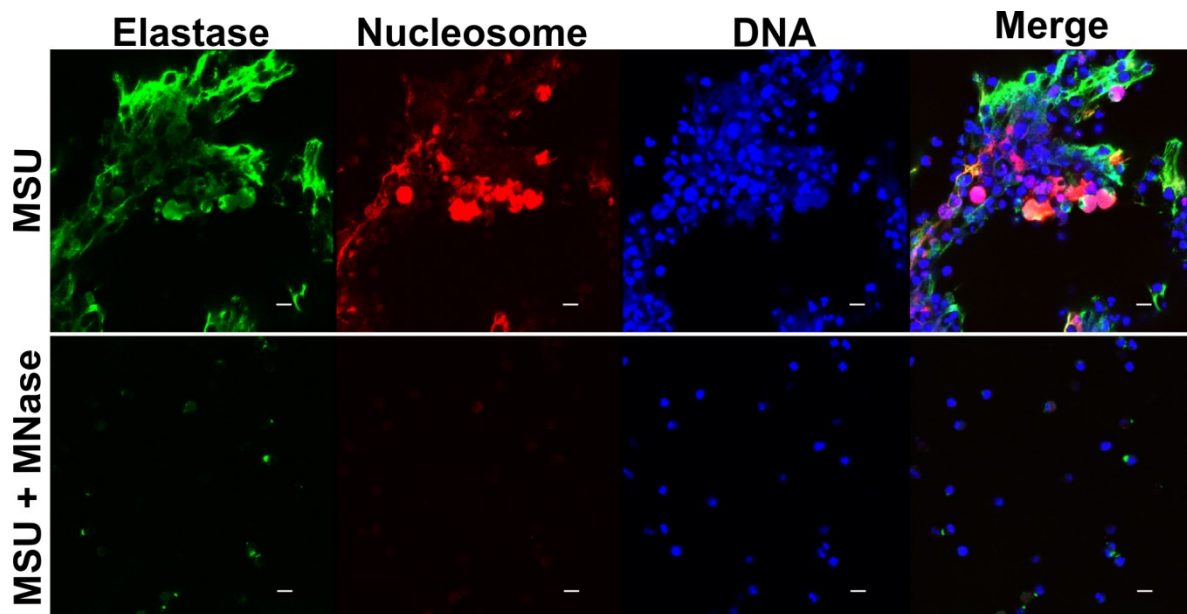

Neutrophils were seeded on poly-L-lysine-coated microscope slides and stimulated with 300  $\mu\text{g/ml}$  MSU for 4 h at 37°C. Nuclease micrococcal (MNase; 10 U/ml) or vehicle were added during the last hour of culture. Then, samples were fixed with 4% PFA, blocked and DNA was stained with TO-PRO-3 (blue), and elastase (green) and nucleosome (red) were stained with specific primary antibodies and their corresponding secondary antibodies. Images were acquired by using a FluoView FV1000 confocal microscope. Scale bar: 20  $\mu\text{m}$ .
