# Supplementary material
Source: PubMed Central journal article supplement (PMC6738901)
Supplement: jin-0009-0387-s14.pdf [file jin-0009-0387-s14.pdf]

**Figure S12. Presence of HMGB1 in NET induced by MSU crystals**

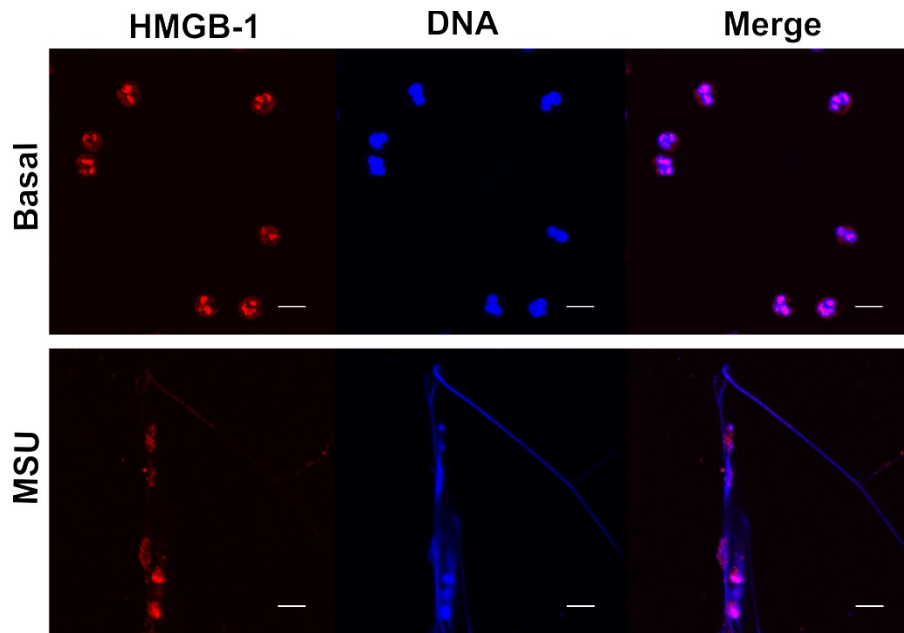

Distribution of HMGB-1 in unstimulated (Basal) and MSU-stimulated neutrophils. Neutrophils were seeded on poly-L-lysine-coated microscope slides and cultured in the absence (Basal) or presence of 300  $\mu\text{g}/\text{ml}$  MSU for 4 h at 37°C. Then, samples were fixed with 4% PFA, permeabilized with 0.5% Triton X-100 and DNA was stained with TO-PRO-3 (blue) and HMGB-1 (red) with a specific antibody and the corresponding secondary antibody. Images were acquired by using a FluoView FV1000 confocal microscope. Scale bar: 10  $\mu\text{m}$ .
